# Supplementary material for: Analysis of mutational dynamics at the DMPK (CTG)n locus identifies saliva as a suitable DNA sample source for genetic analysis in myotonic dystrophy type 1
Source: PubMed Central journal article supplement (PMC6497304; doi:10.1371/journal.pone.0216407), 2019-05-02

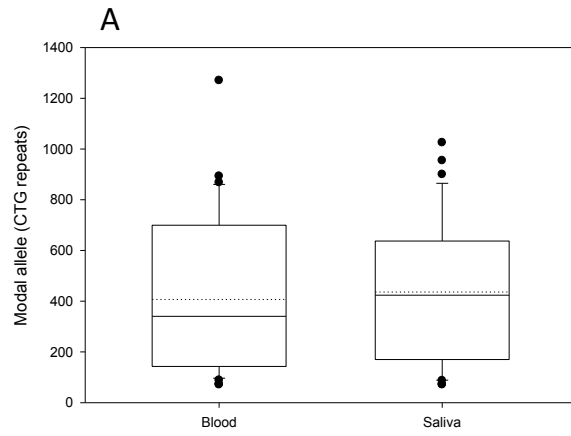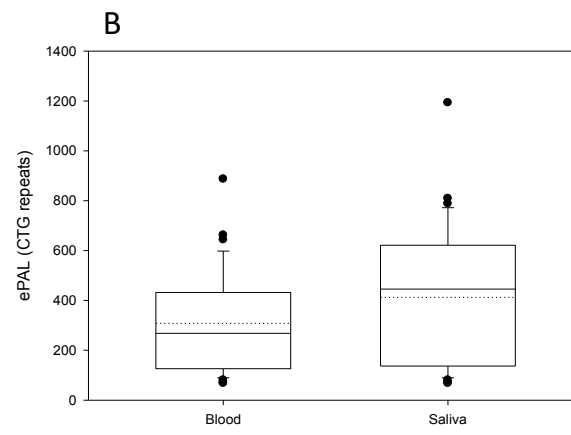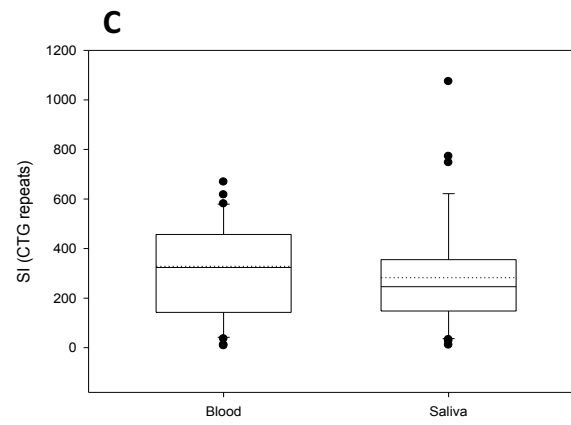

Supplement: pone.0216407.s003.pdf [file pone.0216407.s003.pdf]
